# Supplementary material for: Better Baltic Sea wave forecasts: Improving resolution or introducing ensembles?
Source: Copernicus journal article supplement (doi:10.5194/os-2018-59), 2018-05-31
Supplement: Supplementary file 1 [file os-2018-59-supplement.pdf]

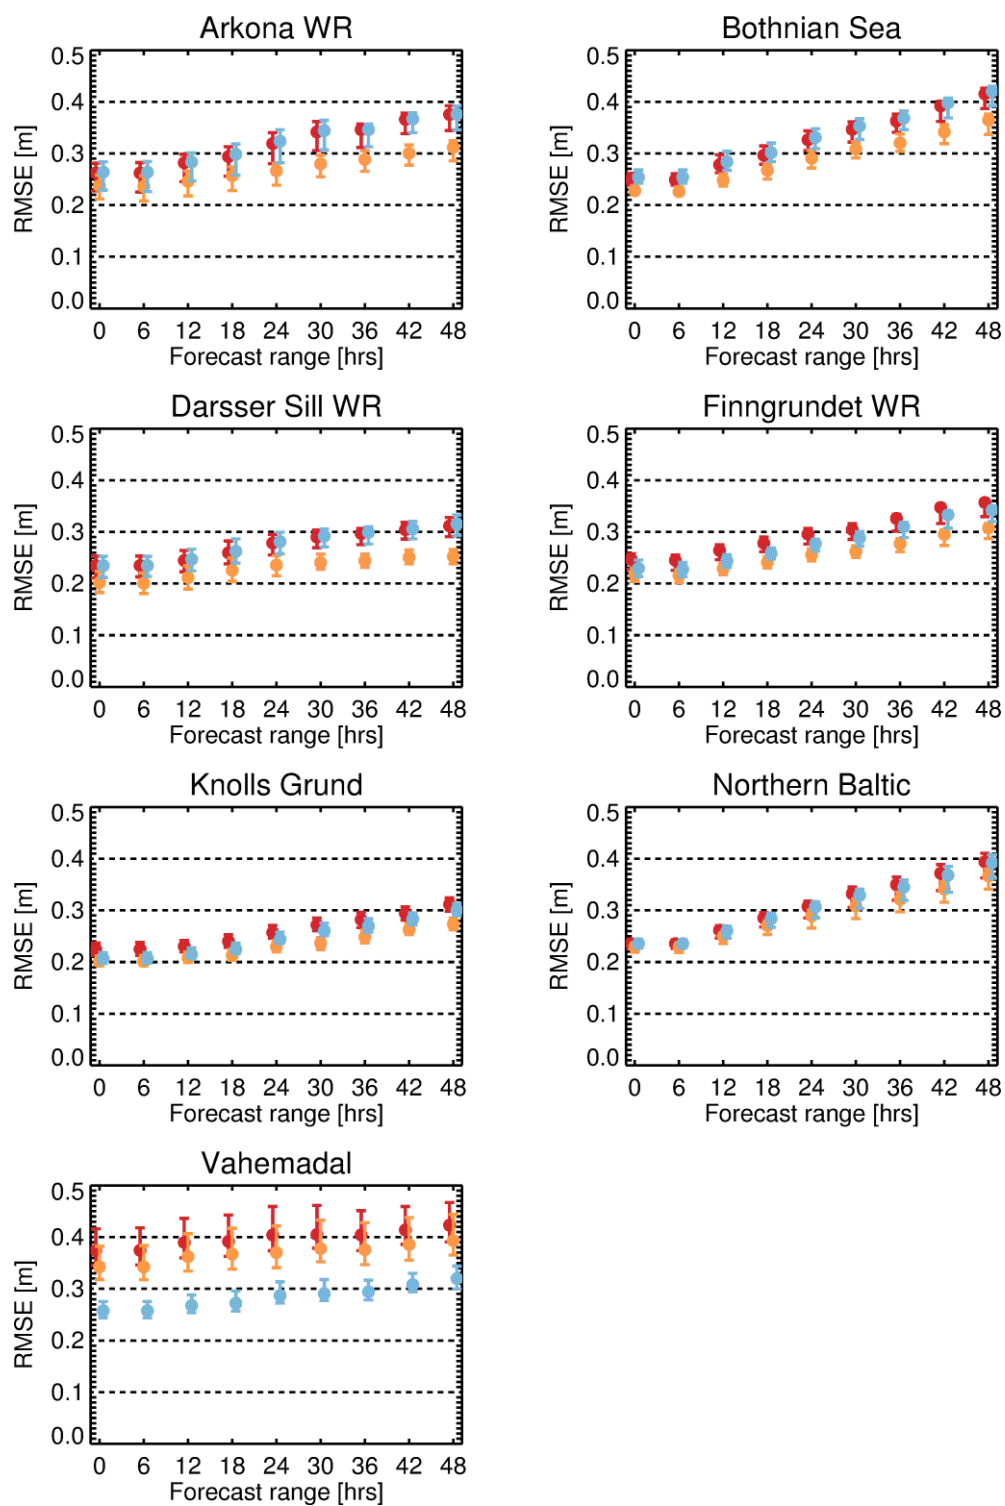

Figure S 1 RMSE for selected forecast ranges for all stations for LOW, LOWENSMEAN and HIGH forecasts. Error bars show 5/95% confidence bands calculated by bootstrapping

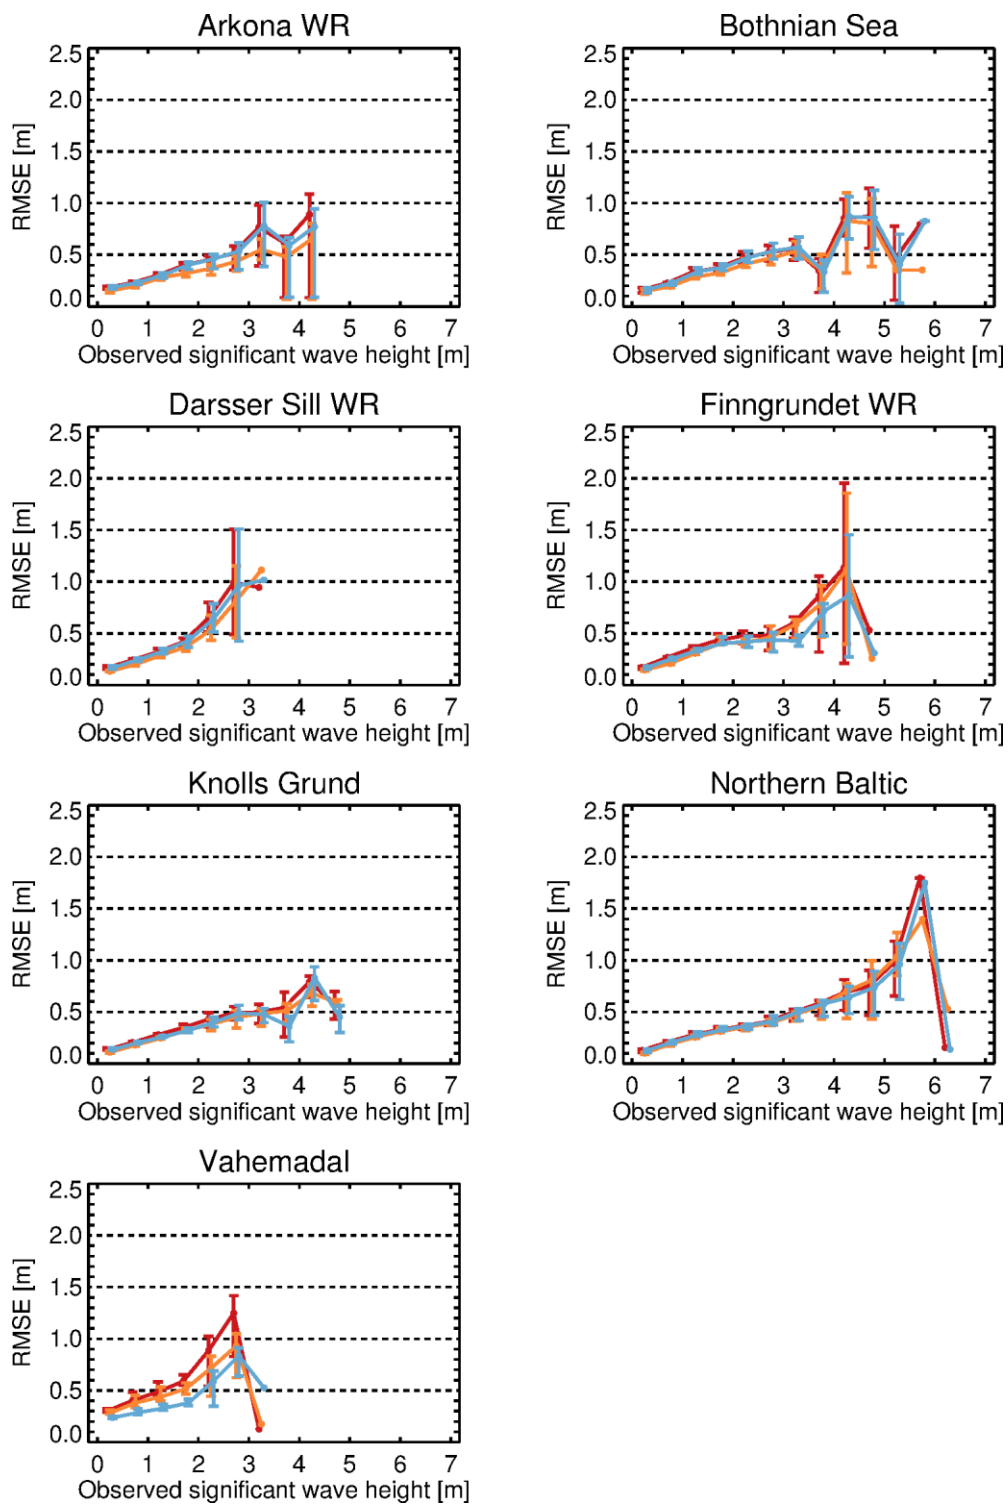

Figure S 2 RMSE as function of SWH for all stations for LOW, LOWENSMEAN and HIGH forecasts and forecast range 24 h. Error bars show 5/95% confidence bands calculated by bootstrapping. No confidence band is given when too few data points are available.

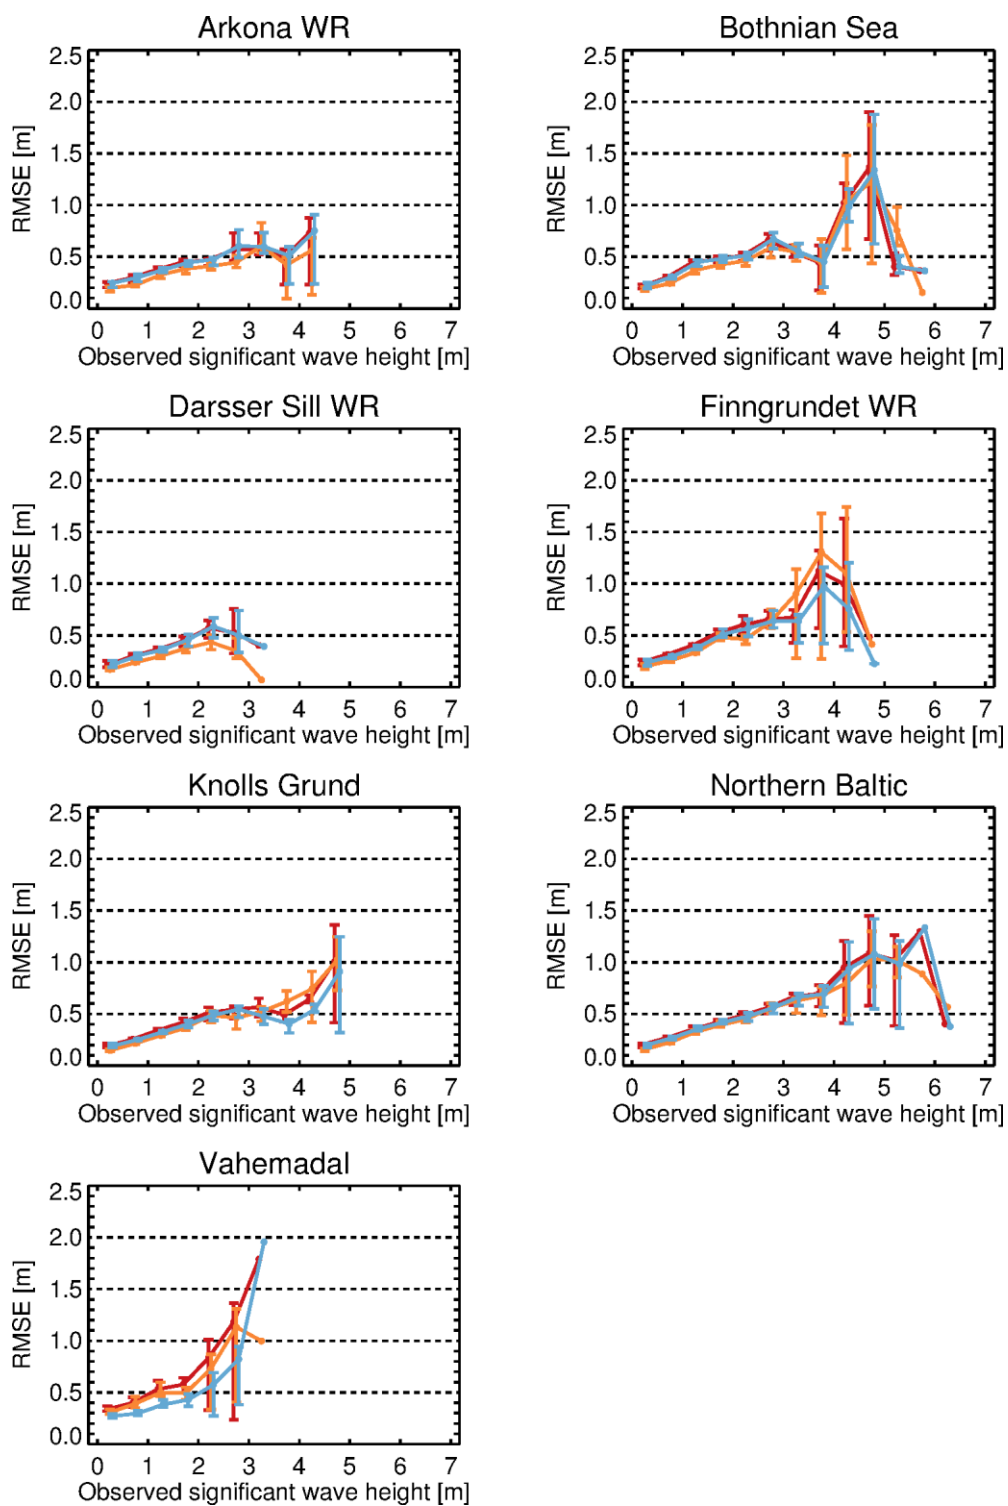

Figure S 3 As Figure S 2 but for 48 h forecast range.

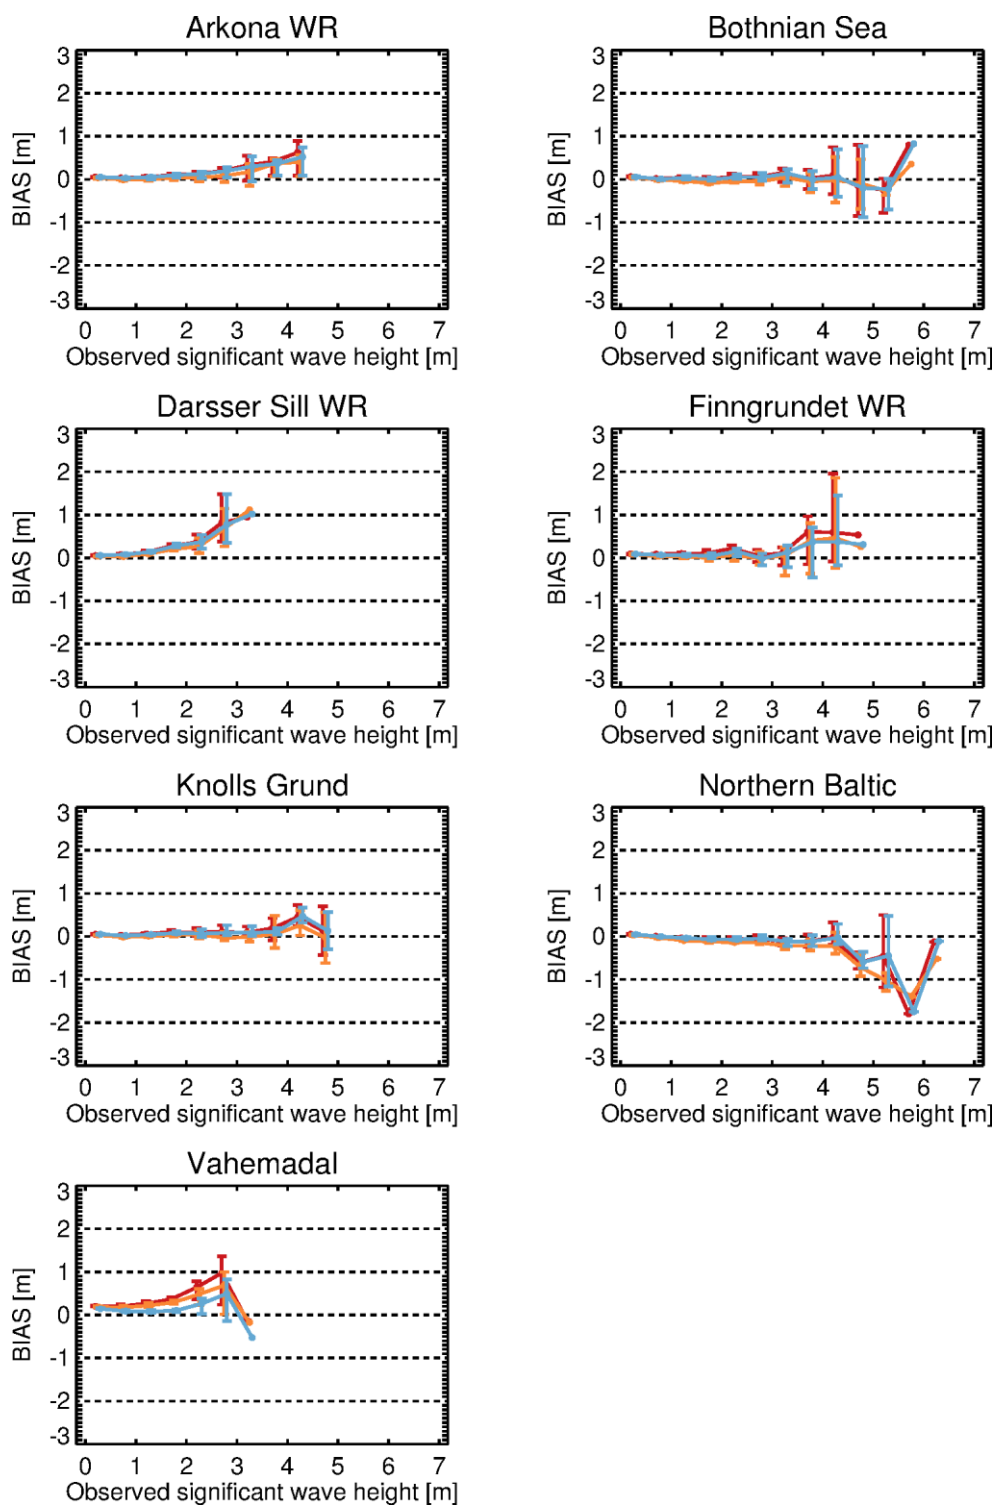

Figure S 4 Bias as function of SWH for all stations for LOW, LOWENSMEAN and HIGH forecasts and forecast range 24 h. Error bars show 5/95% confidence bands calculated by bootstrapping. No confidence band is given when too few data points are available.

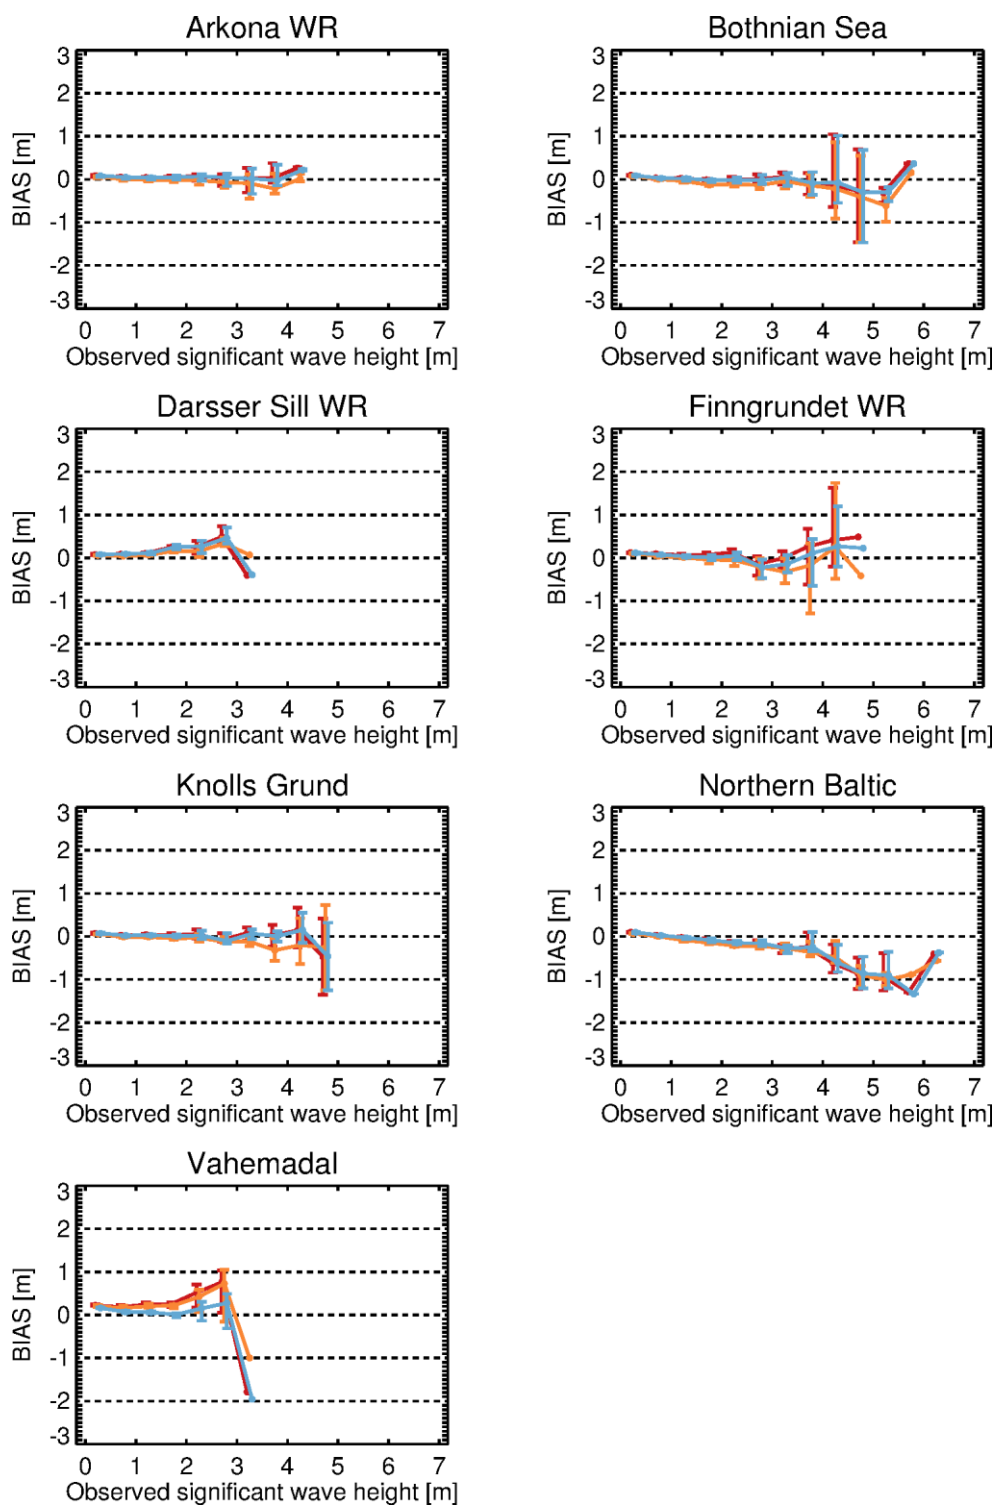

Figure S 5 As Figure S 4 but for forecast range 48 h.

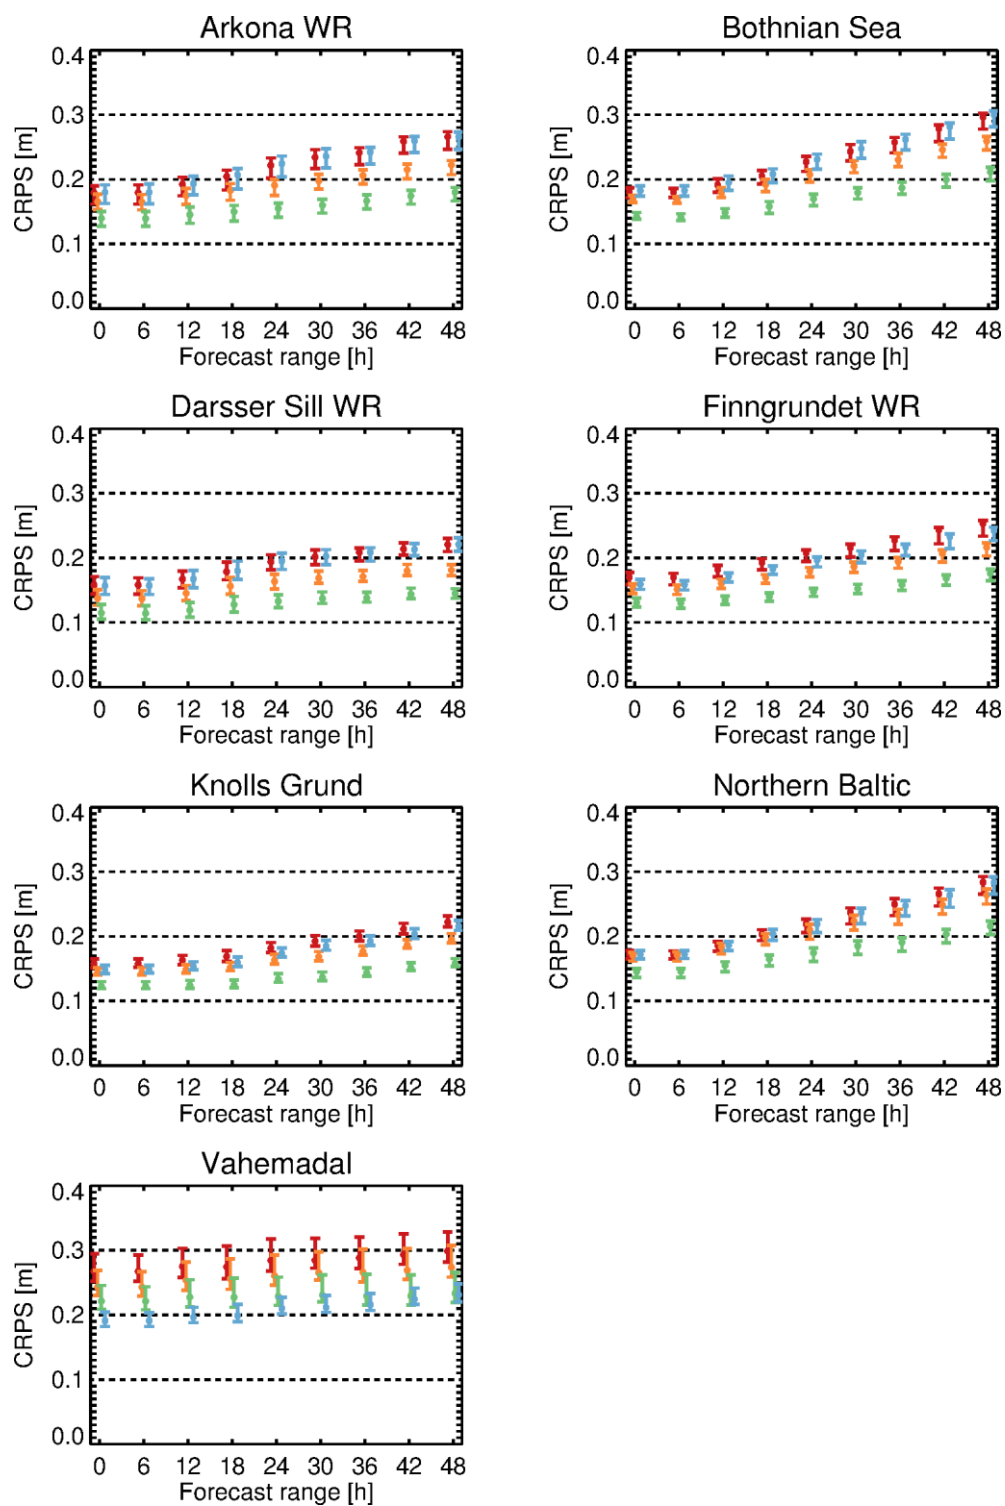

Figure S 6 CRPS for selected forecast ranges for all stations for LOW, LOWENSMEAN, LOW and HIGH forecasts. Error bars show 5/95% confidence bands calculated by bootstrapping.

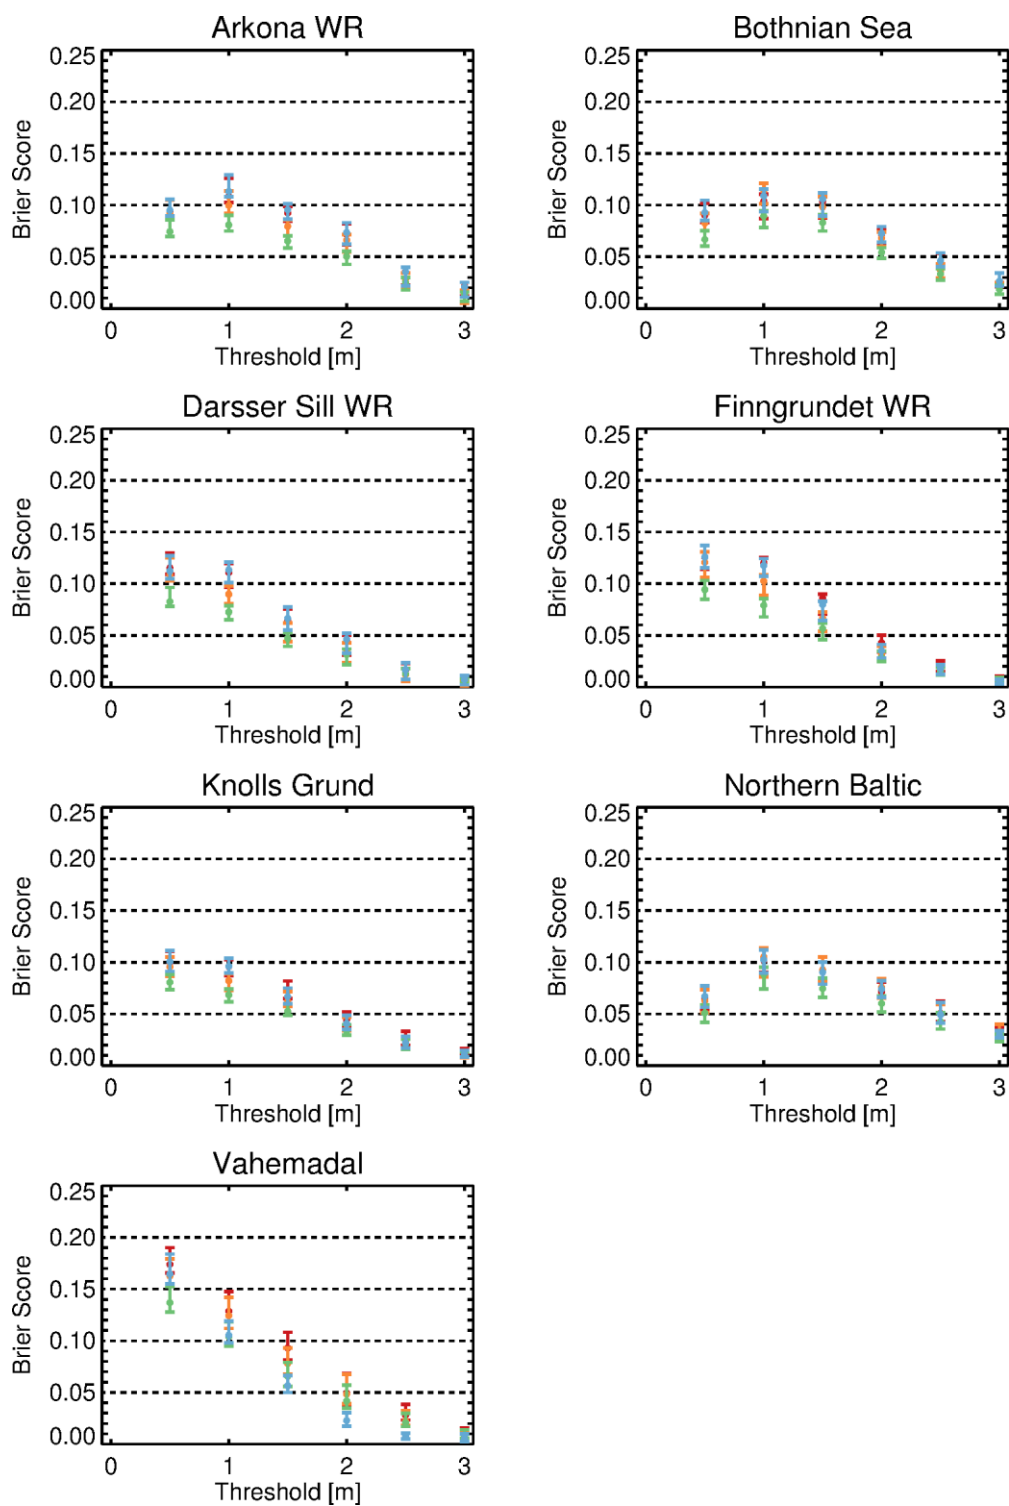

Figure S 7 Brier score for different thresholds for all stations for LOW, LOWENSMEAN, LOW and HIGH and forecast range 24 hrs.

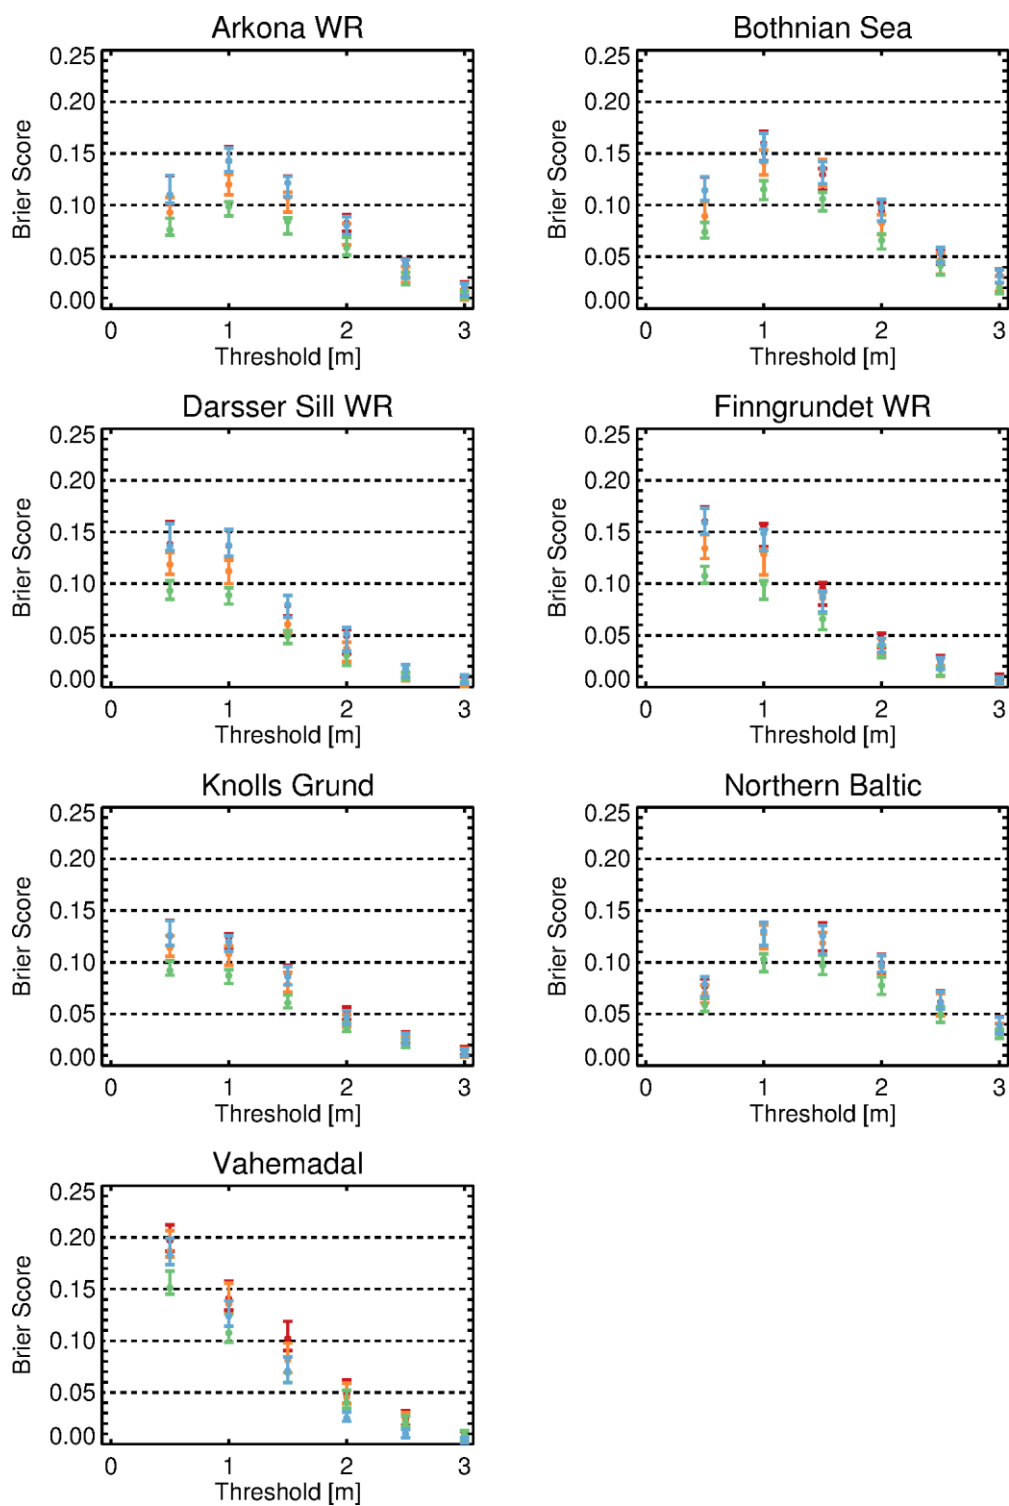

Figure S 8 As Figure S 7 but for forecast range 48 hrs.
